# Supplementary material
Source: MDPI journal article supplement (https://www.mdpi.com/2079-9284/7/2/22)
Supplement: s1 [file s1]

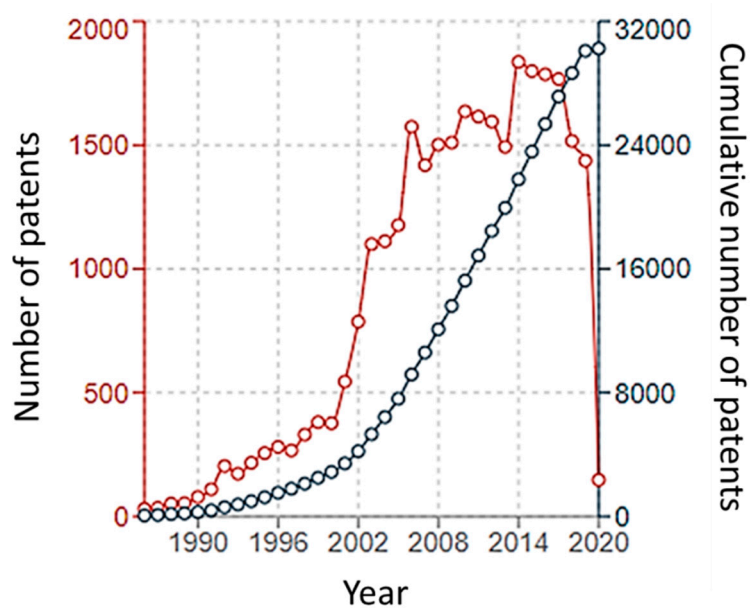

**Figure S1.** Cumulative number of patents filed (blue line graph) and total amount of patents filed each year (red line graph) between 1986 and 2020 under the search query “liposomes” AND “cosmetics”. Data were obtained from *Espacenet* patent database.

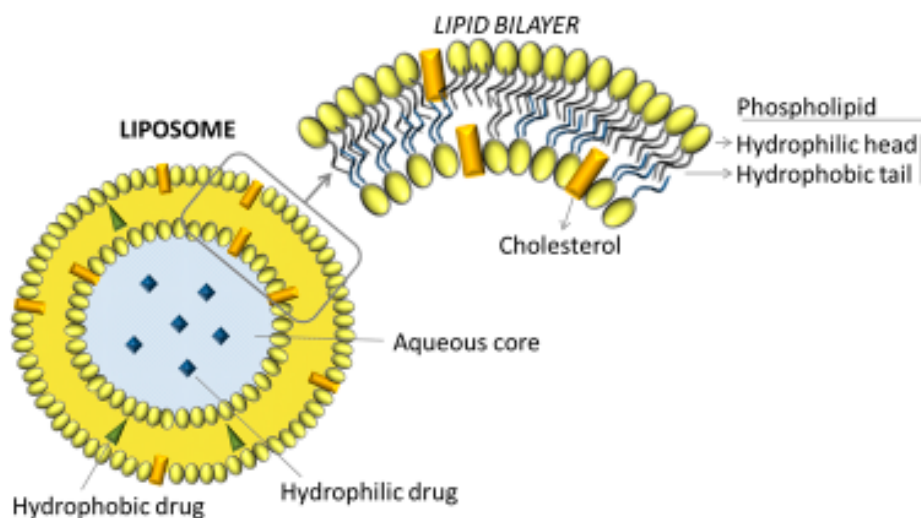

**Figure S2.** Liposome basic representation: aqueous core and phospholipid bilayer.
